# Supplementary material
Source: publisher figshare collection journal article supplement (https://acs.figshare.com/ndownloader/files/12396842)
Supplement: Supplementary file 1 [file 12396842]

# Conformal BiVO<sub>4</sub>-Layer/WO<sub>3</sub>-Nanoplate-Array Heterojunction Photoanode Modified with Cobalt Phosphate Cocatalyst for Significantly Enhanced Photoelectrochemical Performances

Xueliang Zhang,<sup>1,2</sup> Xin Wang,<sup>1,2</sup> Defa Wang,<sup>\*,1,2</sup> and Jinhua Ye<sup>\*,1,2,3</sup>

<sup>1</sup>TJU–NIMS International Collaboration laboratory, Key Lab of Advanced Ceramics and Machining Technology (Ministry of Education), Tianjin Key Lab of Composite and Functional Materials, School of Materials Science and Engineering, Tianjin University, 92 Weijin Road, Tianjin 300072, China

<sup>2</sup>Collaborative Innovation Center of Chemical Science and Engineering (Tianjin), 92 Weijin Road, Tianjin 300072, China

<sup>3</sup>International Center of Materials Nanoarchitectonics (WPI–MANA), National Institute for Materials Science (NIMS), 1-1 Namiki, Tsukuba, Ibaraki 305-0044, Japan

---

\*Corresponding authors. E-mail: [defawang@tju.edu.cn](mailto:defawang@tju.edu.cn) (D. Wang); [jinhua.ye@nims.go.jp](mailto:jinhua.ye@nims.go.jp) (J. Ye).

## S1. Sample Preparation

WO<sub>3</sub> NPAs were prepared by a modified facile hydrothermal method previously reported.<sup>37</sup> Typically, 0.23 g of sodium tungsten (Na<sub>2</sub>WO<sub>4</sub>•2H<sub>2</sub>O) was dissolved in 30 mL of deionized water under constant stirring at room temperature, then 6mL of 3 M hydrochloric acid (HCl) was added drop wise to obtain light yellow precipitate. The suspension became transparent after several minutes of stirring by adding 0.2 g ammonium oxalate ((NH<sub>4</sub>)<sub>2</sub>C<sub>2</sub>O<sub>4</sub>). The as-prepared precursor was transferred into a 50 mL Teflon-lined stainless steel autoclave, which contained a piece of FTO glass substrate leaning against the wall of Teflon vessel with the conducting side facing down. The FTO was ultrasonically cleaned in advance by alcohol, acetone, and alcohol in sequence and dried in a high-pressure nitrogen stream. The autoclave was sealed and placed in an oven, the hydrothermal reaction was carried out at 120 °C for 12 h. After the autoclave was cooled naturally to room temperature, the FTO with a yellow film was taken out and washed by deionized water several times and dried at 60 °C in ambient air overnight. Finally, the as-prepared sample was further heated to 500 °C at a heating rate of 2 °C/min for 1 h in air.

The thin conformal BiVO<sub>4</sub> layer was deposited on WO<sub>3</sub> NPAs by a stepwise spin-coating process. In detail, a solution containing 50 mM bismuth and 46.5 mM vanadium were first prepared by dissolving 0.12 g bismuth nitrate pentahydrate (BiNO<sub>3</sub>•5H<sub>2</sub>O) and 0.08 g vanadyl acetylacetonate (VO (C<sub>5</sub>H<sub>7</sub>O<sub>2</sub>)<sub>2</sub>) in 5 mL mixed solution containing acetic acid and acetyl acetone with volume ratio of 20:1, which was then dropped on the WO<sub>3</sub> NPAs by stepwise spin-coating method. For each coating, 10 µL of precursor solution was dropped on the sample, which was allowed to dry at room temperature and then briefly annealed in a preheated furnace at 450 °C for 5 min. The four kinds of samples were denoted as BiVO<sub>4</sub>-x/WO<sub>3</sub> (x: the amount of BiVO<sub>4</sub> precursor). For example, the BiVO<sub>4</sub>-20/WO<sub>3</sub> film was prepared by repeating above-mentioned process twice, 20 µL of

$\text{BiVO}_4$  precursor solution was used in total. After all the coating steps the samples were annealed at 550 °C in a box furnace for 2 h to yield a conformal  $\text{BiVO}_4$  shell, which densely coated on the surface of  $\text{WO}_3$  NPAs.

Co-Pi OEC was photodeposited on  $\text{BiVO}_4/\text{WO}_3$  heterojunction as described previously.<sup>38, 39</sup> A three-electrode configuration was employed with the as-prepared films as the working electrode, a Ag/AgCl/3MKCl as the reference electrode and a platinum wire as counter electrode. The electrolyte solution was prepared by dissolving 0.5mM cobalt nitrate hexahydrate in 50 mL 0.1 M potassium phosphate buffer solution adjusted to pH = 7. The deposition was carried out at 1.2  $V_{\text{RHE}}$  applied potential by an electrochemical workstation (CHI 660E Instruments) under illumination from a 500 W Xe lamp coupled with an AM1.5G filter, with typical photocurrent density of  $\sim 0.5\text{--}1 \text{ mA/cm}^2$  during deposition. The deposition time was controlled to 100 seconds for optimized thick Co-Pi overlayer.

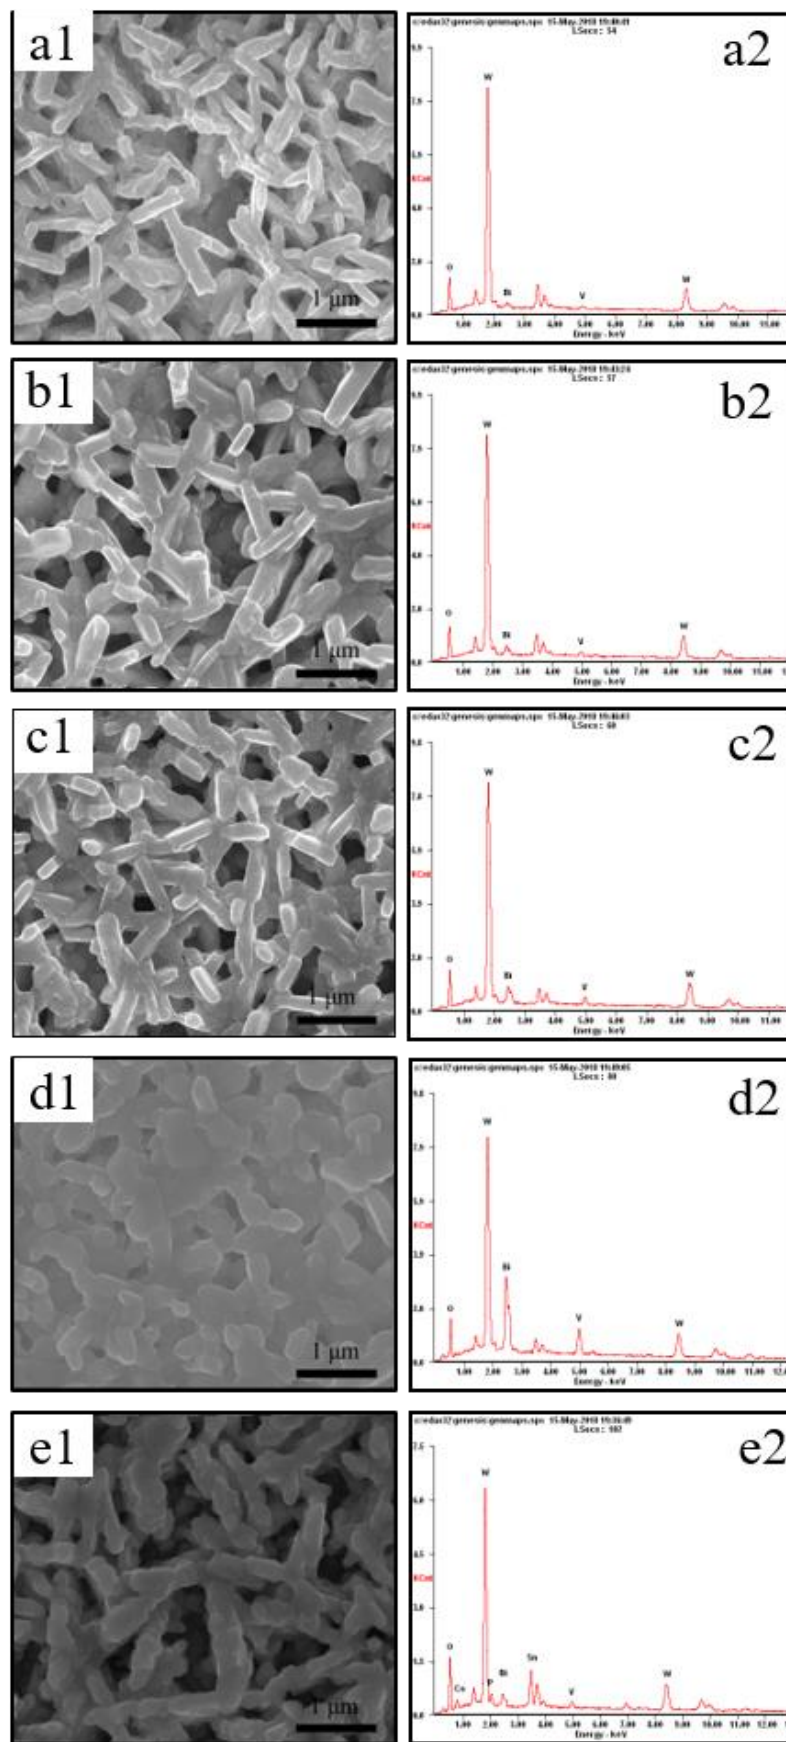

**Fig. S1** SEM images and corresponding EDX analysis of  $\text{BiVO}_4\text{-x/WO}_3$  with different  $\text{BiVO}_4$  content (a1 and a2 for  $\text{BiVO}_4\text{-10/WO}_3$ , b1 and b2 for  $\text{BiVO}_4\text{-20/WO}_3$ , c1 and c2 for  $\text{BiVO}_4\text{-30/WO}_3$ , d1 and d2 for  $\text{BiVO}_4\text{-40/WO}_3$ , and e1 and e2 for  $\text{Co-Pi@BiVO}_4\text{-10/WO}_3$ .)

**Table S1** Atomic ratios of  $\text{BiVO}_4\text{-x/WO}_3$  heterojunction film and  $\text{Co-Pi@BiVO}_4\text{-20/WO}_3$  measured by SEM-EDX

| Samples                               | W     | Bi    | V     | O     | Co   |
|---------------------------------------|-------|-------|-------|-------|------|
| $\text{BiVO}_4\text{-10/WO}_3$        | 37.01 | 1.50  | 1.55  | 59.94 | —    |
| $\text{BiVO}_4\text{-20/WO}_3$        | 35.67 | 2.89  | 2.88  | 58.55 | —    |
| $\text{BiVO}_4\text{-30/WO}_3$        | 32.94 | 4.98  | 4.50  | 57.58 | —    |
| $\text{BiVO}_4\text{-40/WO}_3$        | 25.48 | 13.55 | 11.04 | 49.93 | —    |
| $\text{Co-Pi@ BiVO}_4\text{-20/WO}_3$ | 28.01 | 2.13  | 2.79  | 58.68 | 8.39 |

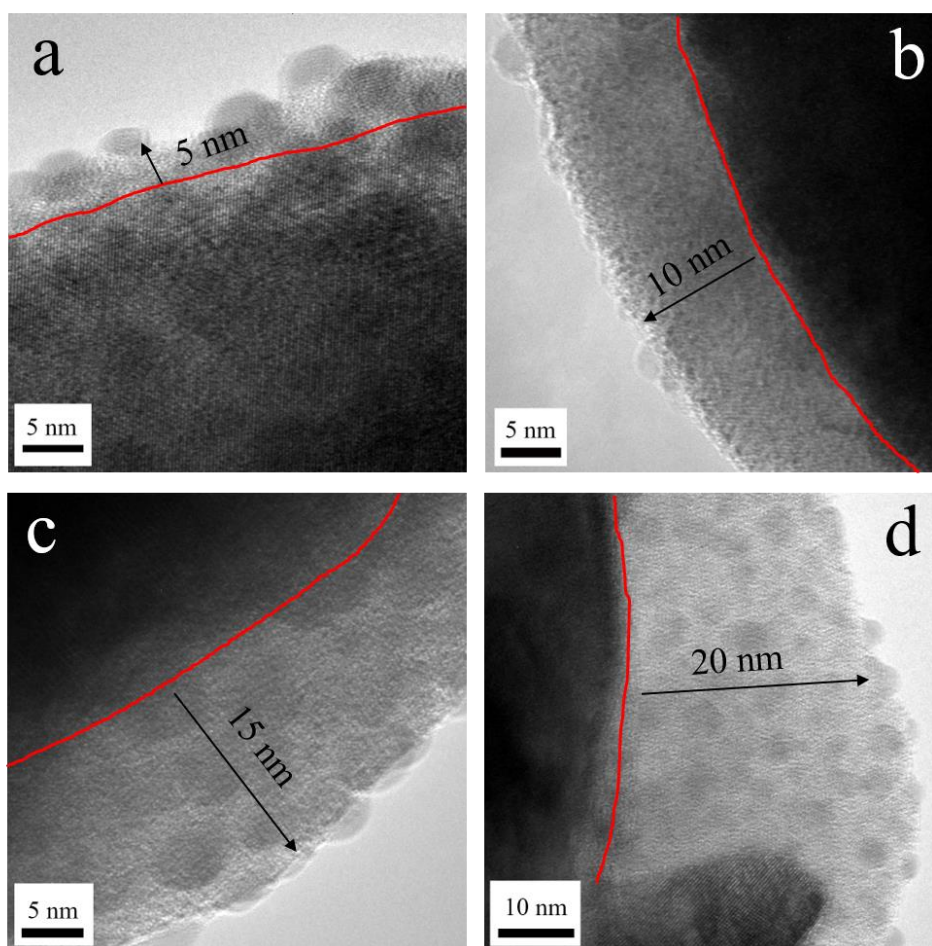

**Fig. S2** HR-TEM images of  $\text{BiVO}_4\text{-x/WO}_3$  heterojunction with different  $\text{BiVO}_4$  content (a, b, c, and d correspond to  $\text{BiVO}_4\text{-10/WO}_3$ ,  $\text{BiVO}_4\text{-20/WO}_3$ ,  $\text{BiVO}_4\text{-30/WO}_3$ ,  $\text{BiVO}_4\text{-40/WO}_3$ , respectively), showing different thicknesses of  $\text{BiVO}_4$  layer.

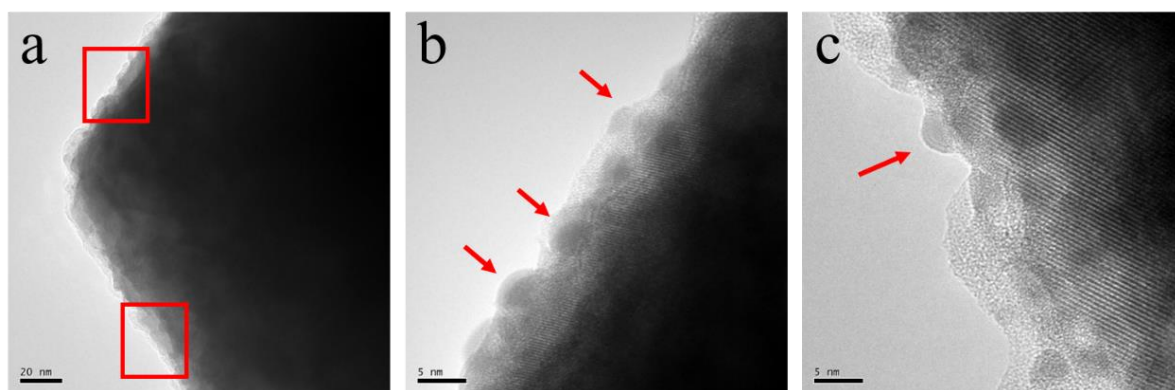

**Fig. S3** TEM image (a) and HRTEM image (b) and (c) of BiVO<sub>4</sub>-20/WO<sub>3</sub>, The nano-dots point out by red arrows were element bismuth segregated from BiVO<sub>4</sub> due to the irradiation of high intensity current electron beam for long duration.

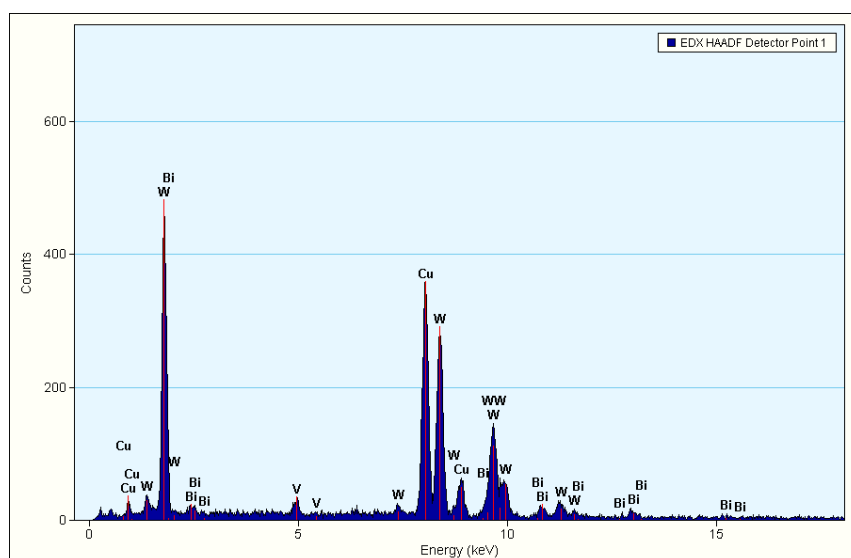

**Fig. S4** TEM-EDX survey spectrum of BiVO<sub>4</sub>-20/WO<sub>3</sub>.

**Table S2** Weight and atomic ratios of Bi:V:W in BiVO<sub>4</sub>-20/WO<sub>3</sub> measured by TEM-EDX

| Element | Weight % | Atom % |
|---------|----------|--------|
| Bi(L)   | 5.029    | 4.310  |
| V(K)    | 1.246    | 4.384  |
| W(L)    | 93.724   | 91.305 |

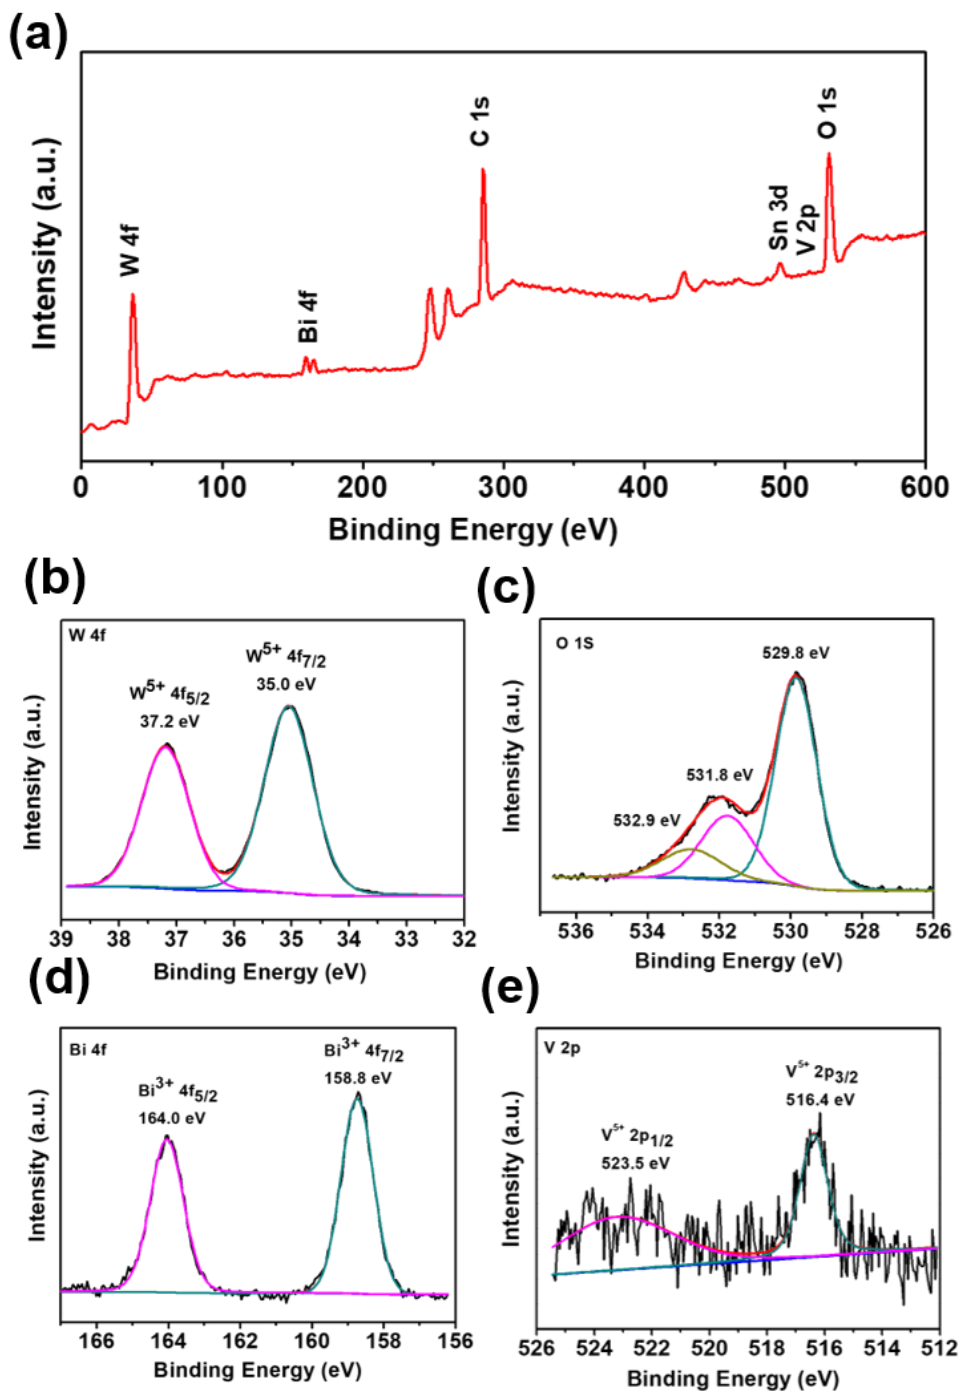

**Fig. S5** XPS spectra of BiVO<sub>4</sub>-20/WO<sub>3</sub>: the survey spectrum (a) and high resolution XPS spectrum of W 4f (b), O 1s (c), Bi 4f (d) and V 2p (e).

**Table S3** Atomic ratio of BiVO<sub>4</sub>-20/WO<sub>3</sub> heterojunction film calculated from XPS measurement

| Sample                                | W     | Bi   | V    | O     |
|---------------------------------------|-------|------|------|-------|
| BiVO <sub>4</sub> -20/WO <sub>3</sub> | 22.76 | 1.76 | 1.36 | 74.13 |

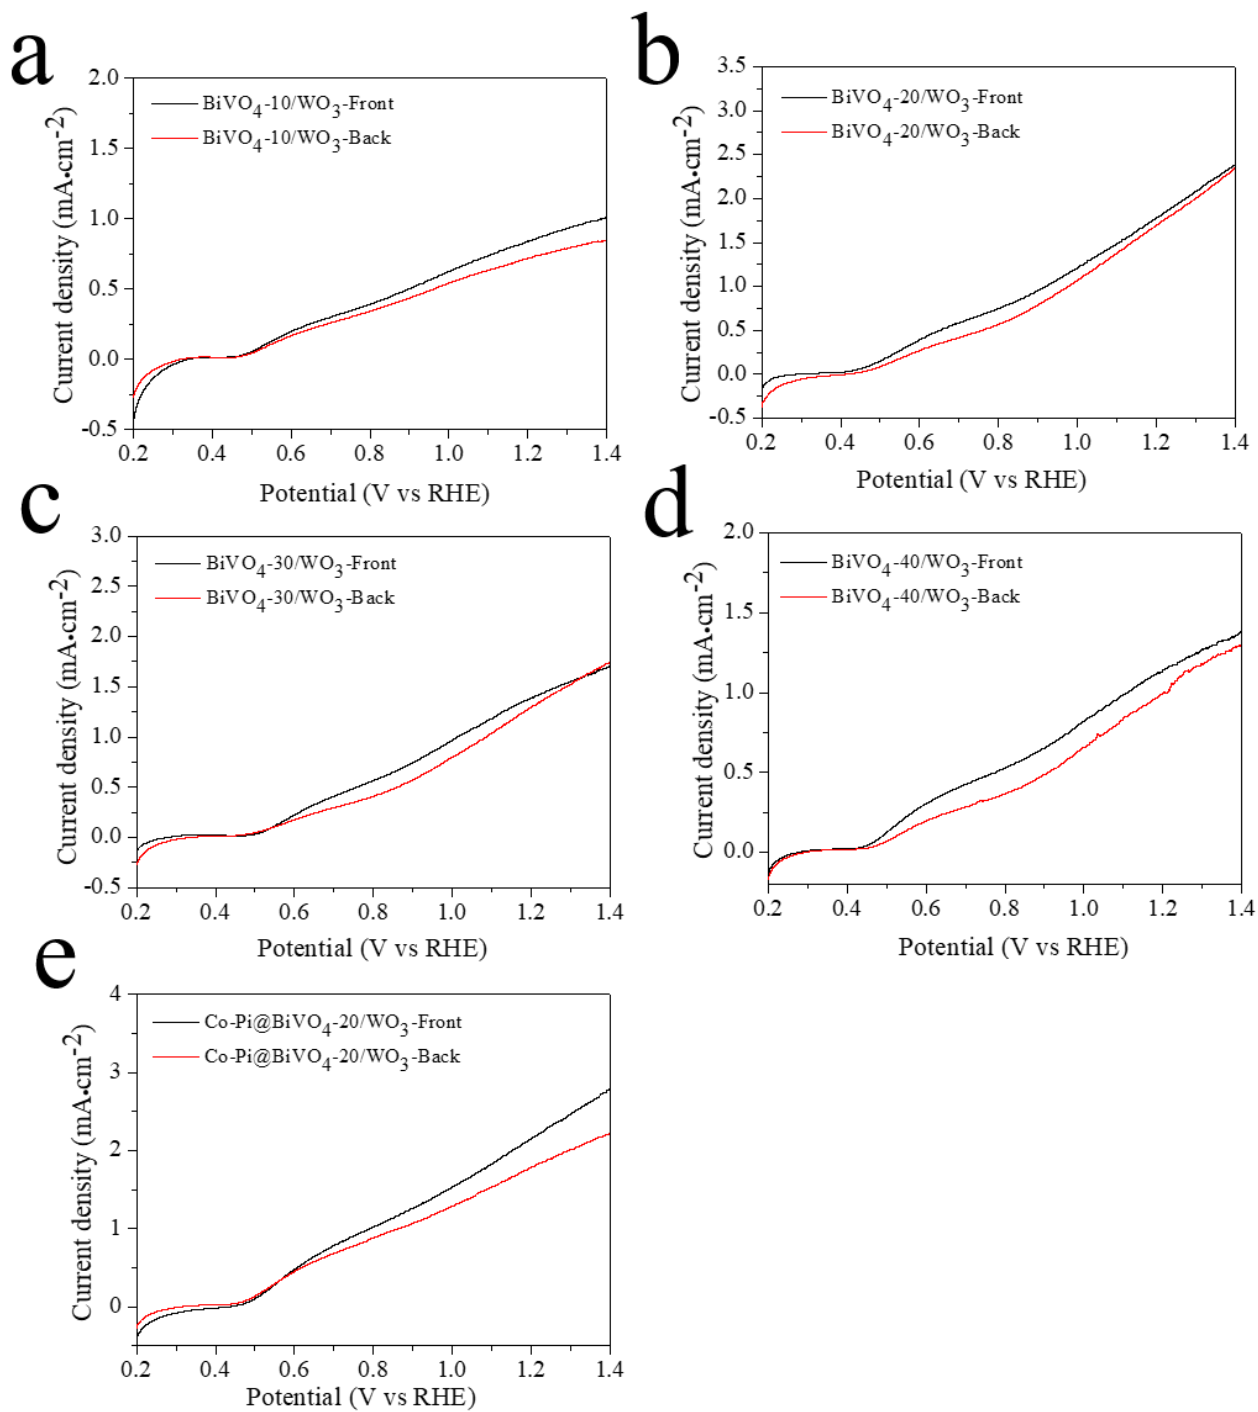

**Fig. S6** J-V curves of (a) BiVO<sub>4</sub>-10/WO<sub>3</sub>, (b) and BiVO<sub>4</sub>-20/WO<sub>3</sub>, (c) BiVO<sub>4</sub>-30/WO<sub>3</sub>, (d) BiVO<sub>4</sub>-40/WO<sub>3</sub>, and (e) Co-Pi@BiVO<sub>4</sub>-20/WO<sub>3</sub> measured in 0.1M phosphate buffer (pH = 7) under front (black line) and back (red line) illuminations.

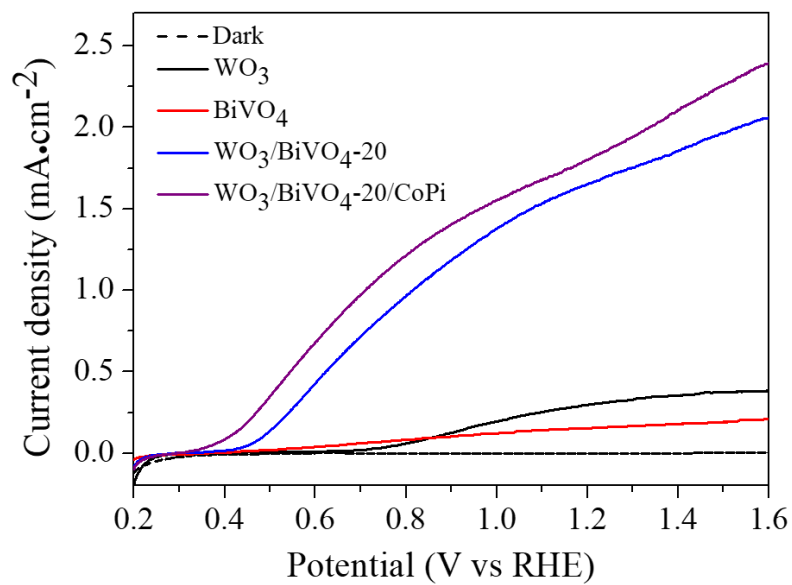

**Fig. S7** J-V curves of WO<sub>3</sub> NPAs, BiVO<sub>4</sub>, BiVO<sub>4</sub>-20/WO<sub>3</sub> and Co-Pi@BiVO<sub>4</sub>-20/WO<sub>3</sub> measured in 0.1 M phosphate buffer (pH=7) under AM1.5G illumination.

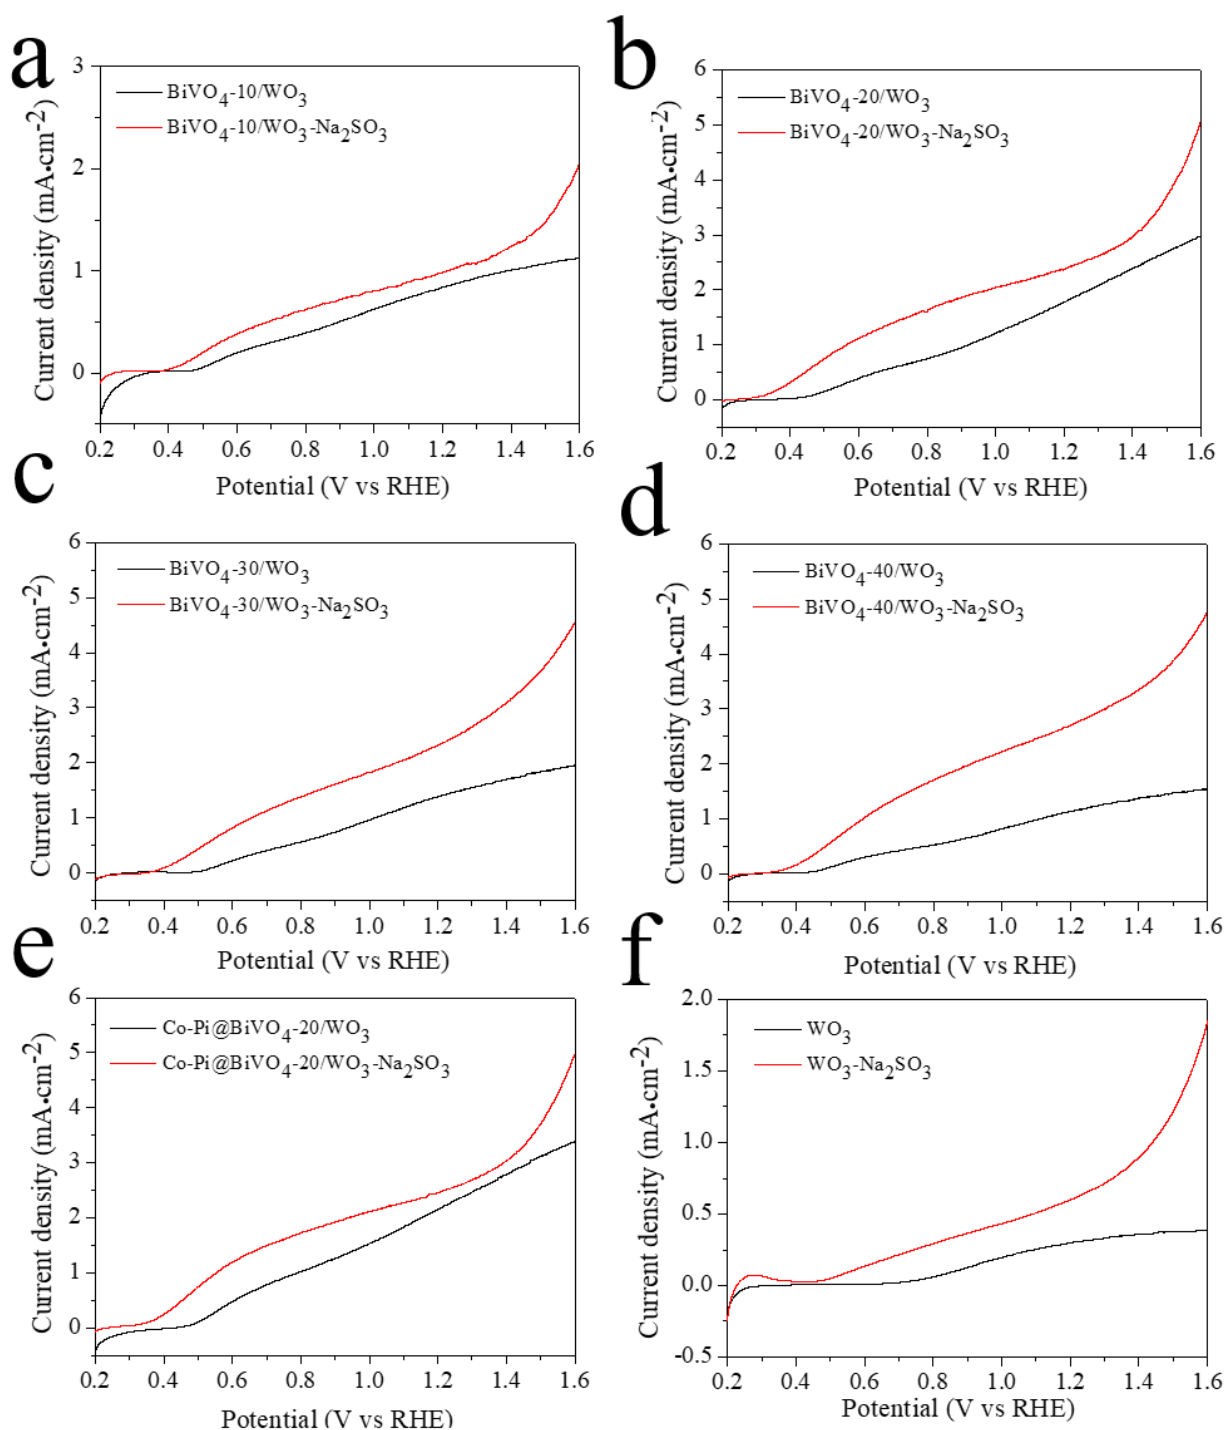

**Fig. S8** LSV curves of BiVO<sub>4</sub>-x/WO<sub>3</sub> heterojunction with different BiVO<sub>4</sub> content and Co-Pi@BiVO<sub>4</sub>-20/WO<sub>3</sub> under AM 1.5G illumination in the potassium phosphate electrolyte with (red line) and without (black line) Na<sub>2</sub>SO<sub>3</sub> hole scavenger. (a, b, c, d, e and f correspond to BiVO<sub>4</sub>-10/WO<sub>3</sub>, BiVO<sub>4</sub>-20/WO<sub>3</sub>, BiVO<sub>4</sub>-30/WO<sub>3</sub>, BiVO<sub>4</sub>-40/WO<sub>3</sub>, Co-Pi@ BiVO<sub>4</sub>-20/WO<sub>3</sub>, and WO<sub>3</sub>, respectively)

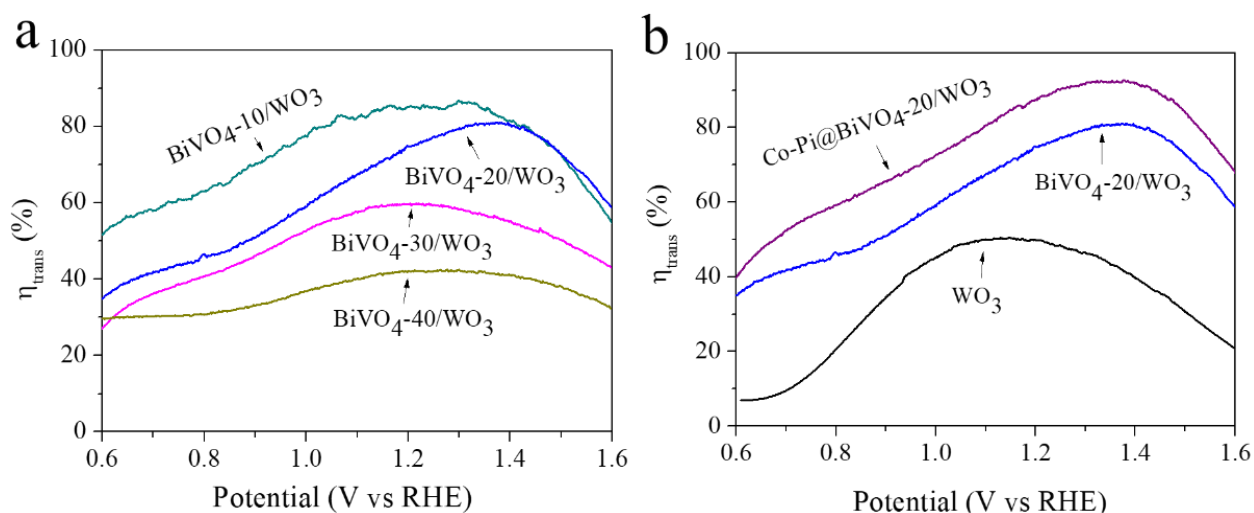

**Fig. S9** Surface charge separation efficiency of (a) BiVO<sub>4</sub>-x/WO<sub>3</sub> heterojunction, and (b) WO<sub>3</sub>, BiVO<sub>4</sub>-20/WO<sub>3</sub>, and Co-Pi@BiVO<sub>4</sub>-20/WO<sub>3</sub> for water oxidation.

**Table S4.** The fitted equivalent circuit and simulated electrochemical parameters of as-prepared photoanodes.

| Samples                                     | $R_s$ | $R_{sc}$ | $C_{sc}$ | $R_{ct}$ | $C_H$    |
|---------------------------------------------|-------|----------|----------|----------|----------|
| WO <sub>3</sub>                             | 5.774 | 50.46    | 3.579E-8 | 2781     | 3.705E-5 |
| BiVO <sub>4</sub>                           | 6.036 | 58.1     | 2.823E-8 | 1880     | 5.135E-6 |
| BiVO <sub>4</sub> -10/WO <sub>3</sub>       | 6.773 | 57.77    | 1.653E-8 | 946.6    | 2.843E-5 |
| BiVO <sub>4</sub> -20/WO <sub>3</sub>       | 4.577 | 58.46    | 1.603E-7 | 266.2    | 2.31E-5  |
| BiVO <sub>4</sub> -30/WO <sub>3</sub>       | 8.818 | 61.6     | 1.37E-8  | 327.9    | 6.261E-5 |
| BiVO <sub>4</sub> -40/WO <sub>3</sub>       | 7.921 | 59.09    | 1.448E-8 | 476.1    | 6.957E-5 |
| Co-Pi@BiVO <sub>4</sub> -20/WO <sub>3</sub> | 1.834 | 22.75    | 8.352E-6 | 124.3    | 4.198E-5 |

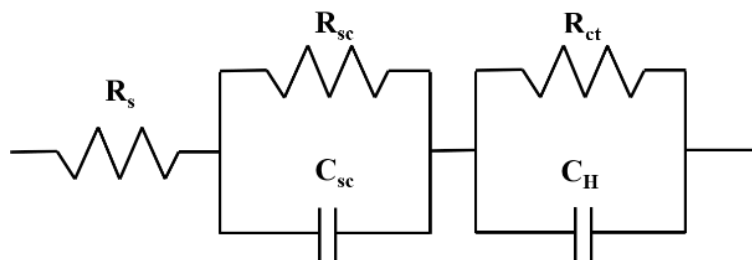

**Table S5** Comparison of calculated lifetime of electron for bare WO<sub>3</sub>, bare BiVO<sub>4</sub>, and BiVO<sub>4</sub>-20/WO<sub>3</sub> heterojunction film.

| <b>Photoanodes</b>                          | <b>f<sub>max</sub>(Hz)</b> | <b>τ<sub>n</sub>(s)</b> |
|---------------------------------------------|----------------------------|-------------------------|
| WO <sub>3</sub>                             | 318324                     | 5.00E-07                |
| BiVO <sub>4</sub>                           | 384240                     | 4.14E-07                |
| BiVO <sub>4</sub> -20/WO <sub>3</sub>       | 68325                      | 2.33E-06                |
| Co-Pi@BiVO <sub>4</sub> -20/WO <sub>3</sub> | 2150                       | 7.41E-05                |
